# Supplementary material
Source: publisher figshare collection journal article supplement (https://acs.figshare.com/ndownloader/files/21387273)
Supplement: Supplementary file 1 [file 21387273]

## **Supporting Information**

### **Direct Electrochemical Sensing of Phosphate in Aqueous Solutions Based on Phase Transition of Calcium Phosphate**

Shuquan Sun, Qixuan, Chen, Sujitraj Sheth, Guoxia Ran, and Qijun Song\*

International Research Center for Photoresponsive Molecules and Materials, School of Chemical and Material Engineering, Jiangnan University, 1800 Lihu Road, Wuxi, Jiangsu Province 214122, P.R.China

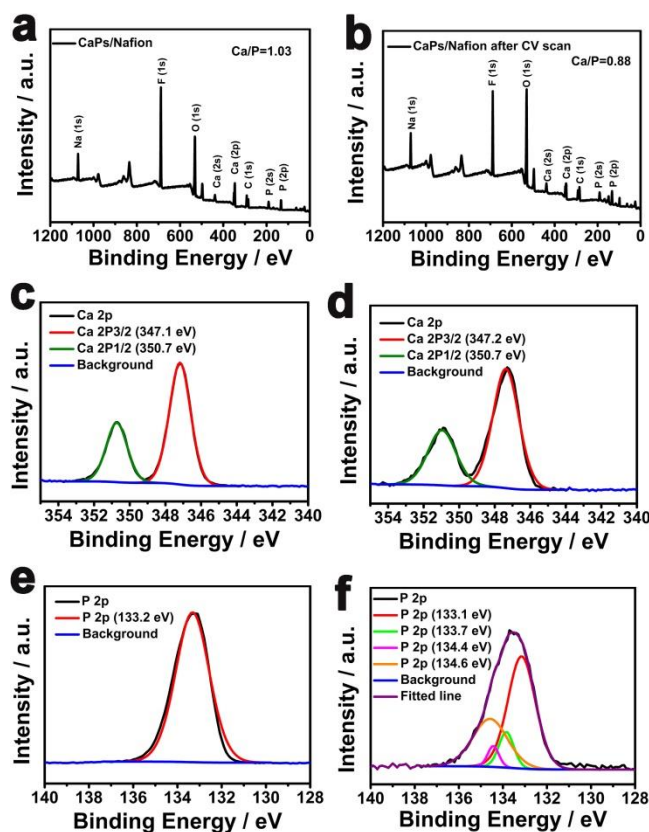

Figure S1. Full-survey X-ray photoelectron spectroscopy (XPS), high-resolution XPS Ca2p spectra, and high-resolution XPS P2p spectra of CaPs/Nafion before (a), (c) and (e) and after (b), (d) and (f) the electrochemical scans in 10  $\mu\text{M}$  phosphate solution with 10  $\mu\text{M}$   $\text{Ca}^{2+}$  for 40 times, respectively. According to the literature,<sup>1,2</sup> the P2p (f) can be deconvoluted to the composition of ACP and OCP (133.1 eV) (55.97%), HAP (133.7 eV) (9.66%),  $\text{PO}_4^{3-}$  (134.1 eV) (4.26%) and  $\text{HPO}_4^{2-}$  (134.6 eV) (30.11%), which are also in accordance with the forms of CaPs in the pH value.<sup>3</sup>

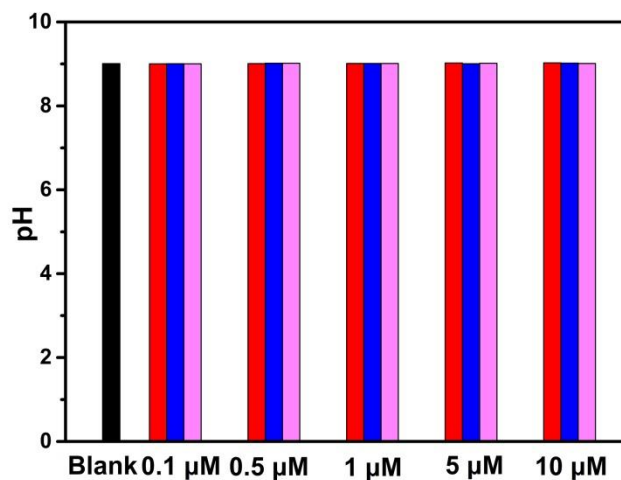

Figure S2. The influence on pH stability of 1.0 mM  $\text{Ca(OH)}_2$  solution (black) with the addition of 0.1  $\mu\text{M}$  to 10  $\mu\text{M}$  phosphate including  $\text{H}_2\text{PO}_4^-$  (red),  $\text{HPO}_4^{2-}$  (blue),  $\text{PO}_4^{3-}$  (pink).

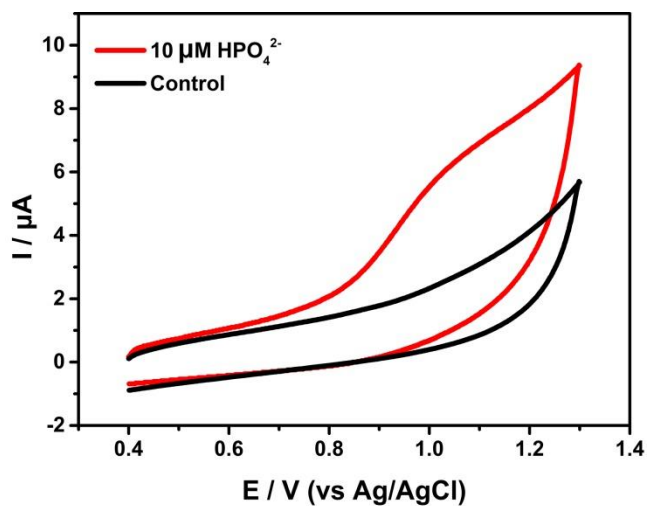

Figure S3. CV curves of CaPs/Nafion in 1.0 mM  $\text{Ca(OH)}_2$  solution with and without the presence of 10  $\mu\text{M}$   $\text{HPO}_4^{2-}$ .

**Table S1.** Solubility of calcium salts with various anions.

| Compound                          | Formula                                                                                                      | Ksp with $\text{Ca}^{2+}$ | References |
|-----------------------------------|--------------------------------------------------------------------------------------------------------------|---------------------------|------------|
| Octacalcium phosphate (OCP)       | $\text{Ca}_8(\text{HPO}_4)_2(\text{PO}_4)_4 \cdot 5\text{H}_2\text{O}$                                       | $2.5 \times 10^{-99}$     | 4          |
| Amorphous calcium phosphate (ACP) | $\text{Ca}_x\text{H}_y(\text{PO}_4)_z \cdot n\text{H}_2\text{O}$ , n )<br>3-4.5; 15-20% $\text{H}_2\text{O}$ | $2.8 \times 10^{-29}$     | 4          |
| Hydroxyapatite (HAP)              | $\text{Ca}_{10}(\text{PO}_4)_6(\text{OH})_2$                                                                 | $5.5 \times 10^{-118}$    | 4          |
| Calcium Carbonate                 | $\text{CaCO}_3$                                                                                              | $2.8 \times 10^{-9}$      | 5          |
| Calcium Sulfate                   | $\text{CaSO}_4$                                                                                              | $4.93 \times 10^{-5}$     | 5          |

**Table S2.** Comparison of different electrochemical methods for phosphate detection.

| Platform                                                          | Linear range                           | Limit of detection  | Supporting electrolyte               | References |
|-------------------------------------------------------------------|----------------------------------------|---------------------|--------------------------------------|------------|
| cobalt phosphate coated cobalt electrode                          | 0.01 to 100 mM                         | No show             | 0.1 M NaCl                           | 6          |
| Ni(OH) <sub>2</sub> /NiO(OH)                                      | No given                               | 0.3 $\mu\text{M}$   | 0.1 M NaOH                           | 7          |
| molybdenum phosphide (MoP)                                        | 0.1 to 20 mM                           | 0.03 mM             | 0.1 M tris-HCl buffer                | 8          |
| surfactant-modified zeolite carbon-paste electrode                | 15.8 to $1.00 \times 10^3 \mu\text{M}$ | 12.8 $\mu\text{M}$  | pH 4-12, 0.1 to 4 mM $\text{NaNO}_3$ | 9          |
| screen-printed electrode modified with carbon black nanoparticles | 0.5 to 100 $\mu\text{M}$               | 0.1 $\mu\text{M}$   | 0.2 M sulfuric acid                  | 10         |
| CaPs/Nafion                                                       | 0.1 to 10 $\mu\text{M}$                | 0.053 $\mu\text{M}$ | 1.0 mM $\text{Ca(OH)}_2$             | This work  |

## References

- (1) Chusuei, C. C.; Goodman, D. W. Calcium Phosphate Phase Identification Using XPS and Time-of-Flight Cluster SIMS. *Anal. Chem.* 1999, 71, 149-153.
- (2) Hanawa, T.; Ota, M. Characterization of surface film formed on titanium in electrolyte using XPS, *Applied Surface Science* 1992, 55, 269-276.
- (3) Lynn, A. K.; Bonfield, W. A Novel Method for the Simultaneous, Titrant-free Control of pH and Calcium Phosphate Mass Yield. *Acc. Chem. Res.* 2005, 38, 202-207.
- (4) Speight, J. G. *Lange's Handbook of Chemistry*, 16th ed.; McGrawHill, Inc.: New York, NY, 2005, p. 1.333
- (5) Wang, L.J.; Nancollas, G.H. Calcium Orthophosphates: Crystallization and Dissolution. *Chem. Rev.* 2008, 108, 4628–4669.
- (6) Xu, K.B.; Kitazumi, Y.K.; Kano, K.J.; Shirai, O. Phosphate ion sensor using a cobalt phosphate coated cobalt electrode. *Electrochim. Acta* 2018, 282, 242e246
- (7) Cheng, W.L.; Sue, J.W.; Chen, W.C.; Chang, J.L.; Zen, J.M. Activated Nickel Platform for Electrochemical Sensing of Phosphate. *Anal. Chem.* 2010, 82, 1157–1161.
- (8) Zhang, J.X., Bian, Y.X., Liu, D., Zhu, Z.W., Shao, Y.H., Li, M.X. Detection of Phosphate in Human Blood Based on a Catalytic Hydrogen Wave at a Molybdenum Phosphide Modified Electrode. *Anal. Chem.* <https://doi.org/10.1021/acs.analchem.9b03862>
- (9) Ejhieh, A.N.; Masoudipour, N. Application of a New Potentiometric Method for Determination of Phosphate based on a Surfactant Modified Zeolite Carbon-paste Electrode (SMZ-CPE), *Anal. Chim. Acta* 2010, 658, 68–74.
- (10) Talarico, D.; Arduini, F.; Amine, A.; Moscone, D.; Paleschi, G. Screen-printed Electrode Modified with Carbon Black Nanoparticles for Phosphate Detection by Measuring the Electroactive Phosphomolybdate Complex, *Talanta* 2015, 141, 267–272.
